# Supplementary material
Source: MDPI journal article supplement (https://www.mdpi.com/search?q=ijms-20-03133)
Supplement: s001 [file ijms-20-03133-s001.pdf]

# Transcriptomic Analysis of *Aedes aegypti* Innate Immune System in Response to Ingestion of Chikungunya Virus

Liming Zhao <sup>1,\*</sup>, Barry W. Alto <sup>1</sup>, Yongxing Jiang <sup>2</sup>, Fahong Yu <sup>3</sup>, and Yanping Zhang <sup>3</sup>

<sup>1</sup> Florida Medical Entomology Laboratory, University of Florida, 200 9th Street South East, Vero Beach, FL 32962, USA; bwalto@ufl.edu

<sup>2</sup> Mosquito Control Services, City of Gainesville, 405 NW 39th Avenue Gainesville, FL 32609, USA; JiangY1@cityofgainesville.org

<sup>3</sup> Interdisciplinary Center for Biotechnology Research, University of Florida, 2033 Mowry Road, Gainesville, FL 32611, USA; fyu@ufl.edu (F.Y.); yanp@ufl.edu (Y.Z.)

\* Correspondence: lmzhao@ufl.edu; Tel.: +01-772-778-7200

**Received:** 21 May 2019; **Accepted:** 23 June 2019; **Published:** 26 June 2019

**Figure S1 (A–E).** GO analyses for RNA-seq data. Overview of the functional categories of differentially expressed (DE) transcripts in response to CHIKV infection. DE genes were determined based on statistical analysis by DESeq package. The total number of DE genes for each comparison is shown in parentheses in each figure. Gene ontology analysis of DE genes was performed based on the database of AmiGO 2. Up, upregulated DE genes; Down, downregulated DE genes. A. 3 hours post injection KW-CHIKV compared with KW-Control; B. 3-day post infection, KW-CHIKV compared with KW-Control; C. 3-day post infection, KW-Control compared with OR-Control; D. 3-day post infection, KW-CHIKV compared with OR-CHIKV; E. 3-day post infection, E1. OR-CHIKV compared with OR-Control; E2. OR-CHIKV compared with OR-Control 339 gene down regulated with  $p_{adj} \leq 0.01$  only three genes were detected in the GO, which not shown in the figure.

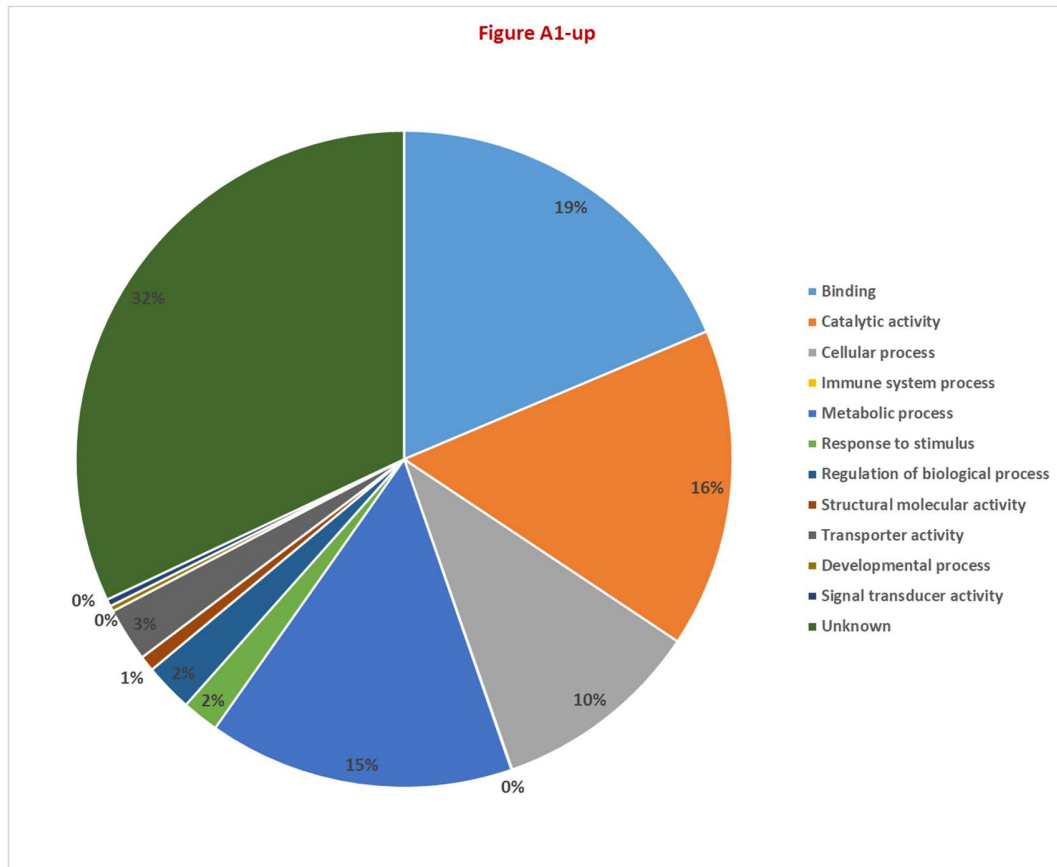

| Functional categories |                                  | Gene No. | Percentage |
|-----------------------|----------------------------------|----------|------------|
| GO:0005488            | Binding                          | 242      | 18.64%     |
| GO:0003824            | Catalytic activity               | 204      | 15.71%     |
| GO:0009987            | Cellular process                 | 134      | 10.31%     |
| GO:0002376            | Immune system process            | 0        | 0.00%      |
| GO:0008152            | Metabolic process                | 196      | 15.05%     |
| GO:0050896            | Response to stimulus             | 24       | 1.82%      |
| GO:0050789            | Regulation of biological process | 31       | 2.37%      |
| GO:0005198            | Structural molecular activity    | 10       | 0.77%      |
| GO:0005215            | Transporter activity             | 34       | 2.65%      |
| GO:0032502            | Developmental process            | 4        | 0.29%      |
| GO:0004871            | Signal transducer activity       | 5        | 0.34%      |
|                       |                                  | 883      |            |
|                       | Unknown                          | 416      | 32.02%     |
| <b>Figure S1A1</b>    | Total                            | 1299     |            |

Figure A2-down

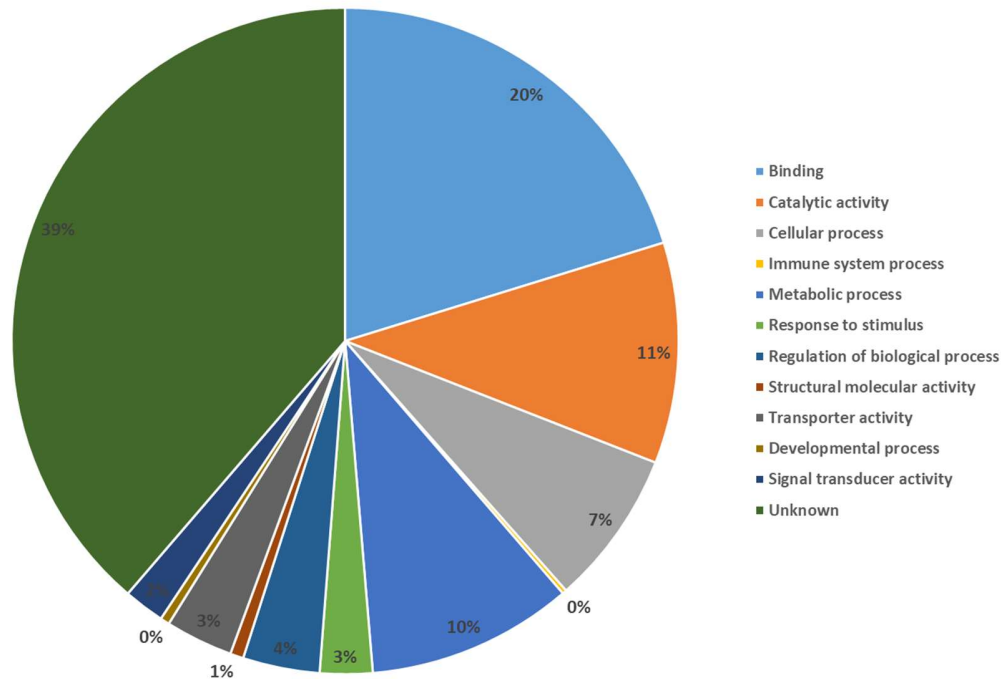

| Functional categories |                                  | Gene No.    | Percentage |
|-----------------------|----------------------------------|-------------|------------|
| GO:0005488            | Binding                          | 246         | 20.23%     |
| GO:0003824            | Catalytic activity               | 130         | 10.72%     |
| GO:0009987            | Cellular process                 | 92          | 7.53%      |
| GO:0002376            | Immune system process            | 2           | 0.20%      |
| GO:0008152            | Metabolic process                | 122         | 9.99%      |
| GO:0050896            | Response to stimulus             | 31          | 2.55%      |
| GO:0050789            | Regulation of biological process | 45          | 3.72%      |
| GO:0005198            | Structural molecular activity    | 8           | 0.65%      |
| GO:0005215            | Transporter activity             | 40          | 3.28%      |
| GO:0032502            | Developmental process            | 5           | 0.45%      |
| GO:0004871            | Signal transducer activity       | 24          | 1.98%      |
|                       |                                  | 746         |            |
|                       | Unknown                          | 471         | 38.70%     |
| <b>Figure S1A2</b>    | <b>Total</b>                     | <b>1217</b> |            |

Figure B1-up

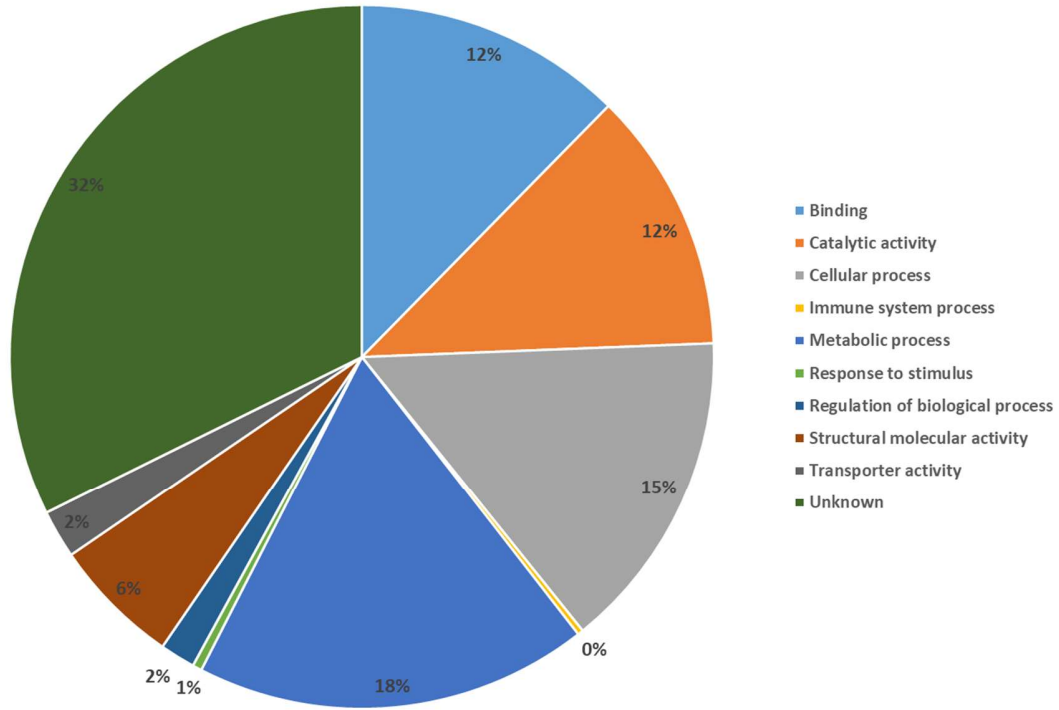

| Functional categories |                                  | Gene No.   | Percentage |
|-----------------------|----------------------------------|------------|------------|
| GO:0005488            | Binding                          | 65         | 13.11%     |
| GO:0003824            | Catalytic activity               | 63         | 12.75%     |
| GO:0009987            | Cellular process                 | 78         | 15.73%     |
| GO:0002376            | Immune system process            | 1          | 2.71%      |
| GO:0008152            | Metabolic process                | 95         | 19.16%     |
| GO:0050896            | Response to stimulus             | 2          | 0.45%      |
| GO:0050789            | Regulation of biological process | 9          | 1.72%      |
| GO:0005198            | Structural molecular activity    | 31         | 6.24%      |
| GO:0005215            | Transporter activity             | 12         | 2.35%      |
| GO:0032502            | Developmental process            | 0          | 0.00%      |
| GO:0004871            | Signal transducer activity       | 0          | 0.00%      |
|                       |                                  | 356        |            |
|                       | Unknown                          | 170        | 34.27%     |
| <b>Figure S1B1</b>    | <b>Total</b>                     | <b>496</b> |            |

**Figure B2-down**

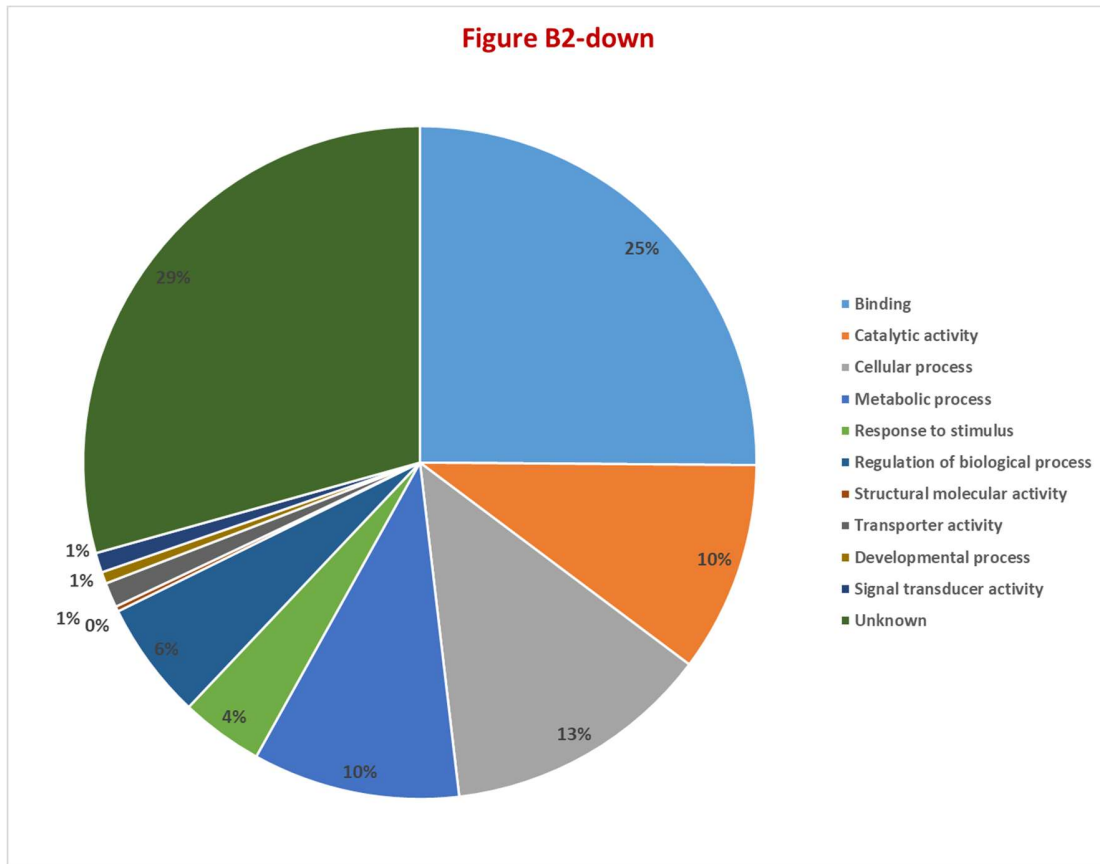

| Functional categories |                                  | Gene No.    | Percentage |
|-----------------------|----------------------------------|-------------|------------|
| GO:0005488            | Binding                          | 308         | 25.13%     |
| GO:0003824            | Catalytic activity               | 124         | 10.12%     |
| GO:0009987            | Cellular process                 | 158         | 12.90%     |
| GO:0002376            | Immune system process            | 0           | 0.00%      |
| GO:0008152            | Metabolic process                | 122         | 9.94%      |
| GO:0050896            | Response to stimulus             | 49          | 3.97%      |
| GO:0050789            | Regulation of biological process | 69          | 5.66%      |
| GO:0005198            | Structural molecular activity    | 3           | 0.25%      |
| GO:0005215            | Transporter activity             | 15          | 1.19%      |
| GO:0032502            | Developmental process            | 7           | 0.56%      |
| GO:0004871            | Signal transducer activity       | 12          | 0.95%      |
|                       |                                  | 867         |            |
|                       | Unknown                          | 360         | 29.34%     |
| <b>Figure S1B2</b>    | <b>Total</b>                     | <b>1227</b> |            |

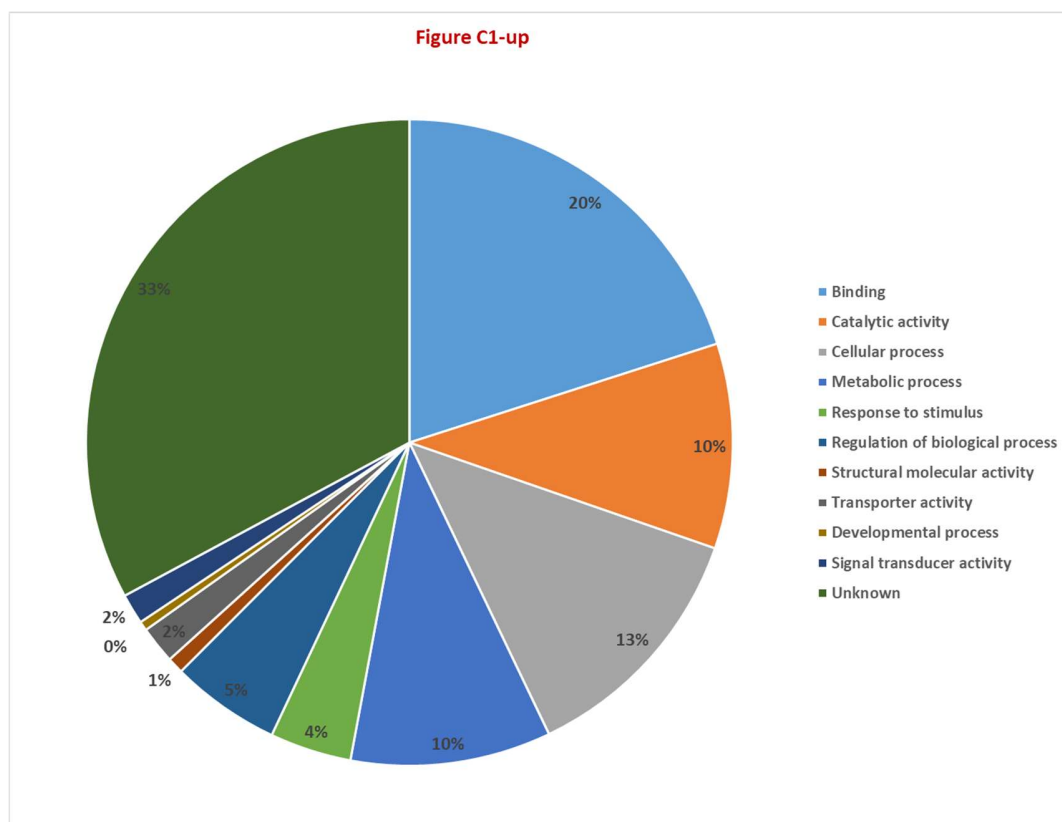

| Functional categories |                                  | Gene No. | Percentage |
|-----------------------|----------------------------------|----------|------------|
| GO:0005488            | Binding                          | 70       | 20.05%     |
| GO:0003824            | Catalytic activity               | 36       | 10.26%     |
| GO:0009987            | Cellular process                 | 44       | 12.59%     |
| GO:0002376            | Immune system process            | 0        | 0.00%      |
| GO:0008152            | Metabolic process                | 35       | 10.03%     |
| GO:0050896            | Response to stimulus             | 14       | 4.08%      |
| GO:0050789            | Regulation of biological process | 19       | 5.48%      |
| GO:0005198            | Structural molecular activity    | 3        | 0.82%      |
| GO:0005215            | Transporter activity             | 7        | 1.87%      |
| GO:0032502            | Developmental process            | 2        | 0.47%      |
| GO:0004871            | Signal transducer activity       | 5        | 1.52%      |
|                       |                                  | 235      |            |
|                       | Unknown                          | 115      | 32.85%     |
| <b>Figure S1C1</b>    | Total                            | 350      |            |

Figure C2-down

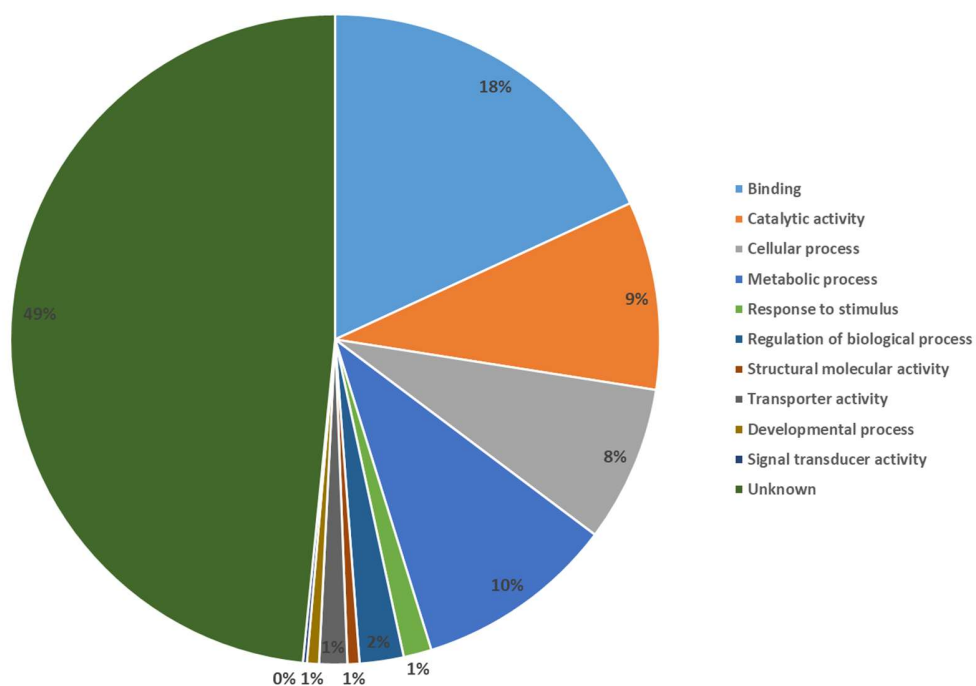

| Functional categories |                                  | Gene No. | Percentage |
|-----------------------|----------------------------------|----------|------------|
| GO:0005488            | Binding                          | 46       | 18.13%     |
| GO:0003824            | Catalytic activity               | 24       | 9.36%      |
| GO:0009987            | Cellular process                 | 20       | 7.77%      |
| GO:0002376            | Immune system process            | 0        | 0.00%      |
| GO:0008152            | Metabolic process                | 25       | 9.96%      |
| GO:0050896            | Response to stimulus             | 4        | 1.39%      |
| GO:0050789            | Regulation of biological process | 6        | 2.19%      |
| GO:0005198            | Structural molecular activity    | 2        | 0.60%      |
| GO:0005215            | Transporter activity             | 4        | 1.39%      |
| GO:0032502            | Developmental process            | 2        | 0.60%      |
| GO:0004871            | Signal transducer activity       | 1        | 0.20%      |
|                       |                                  | 130      |            |
|                       | Unknown                          | 122      | 48.41%     |
| Figure S1C2           | Total                            | 252      |            |

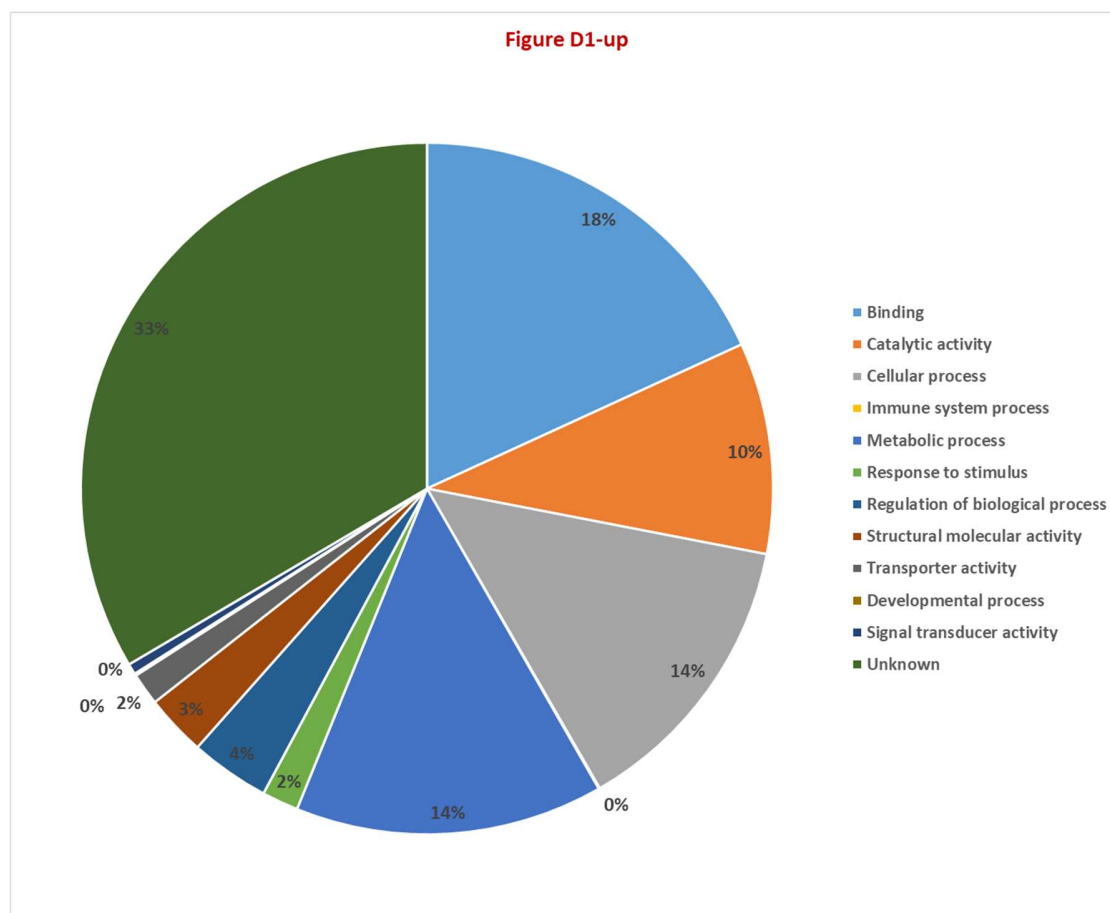

| Functional categories |                                  | Gene No.   | Percentage |
|-----------------------|----------------------------------|------------|------------|
| GO:0005488            | Binding                          | 156        | 18.16%     |
| GO:0003824            | Catalytic activity               | 85         | 9.88%      |
| GO:0009987            | Cellular process                 | 117        | 13.64%     |
| GO:0002376            | Immune system process            | 0          | 0.00%      |
| GO:0008152            | Metabolic process                | 124        | 14.40%     |
| GO:0050896            | Response to stimulus             | 15         | 1.71%      |
| GO:0050789            | Regulation of biological process | 32         | 3.71%      |
| GO:0005198            | Structural molecular activity    | 25         | 2.86%      |
| GO:0005215            | Transporter activity             | 13         | 1.50%      |
| GO:0032502            | Developmental process            | 1          | 0.10%      |
| GO:0004871            | Signal transducer activity       | 4          | 0.50%      |
|                       |                                  | 572        |            |
|                       | Unknown                          | 288        | 48.41%     |
| <b>Figure S1D1</b>    | <b>Total</b>                     | <b>860</b> |            |



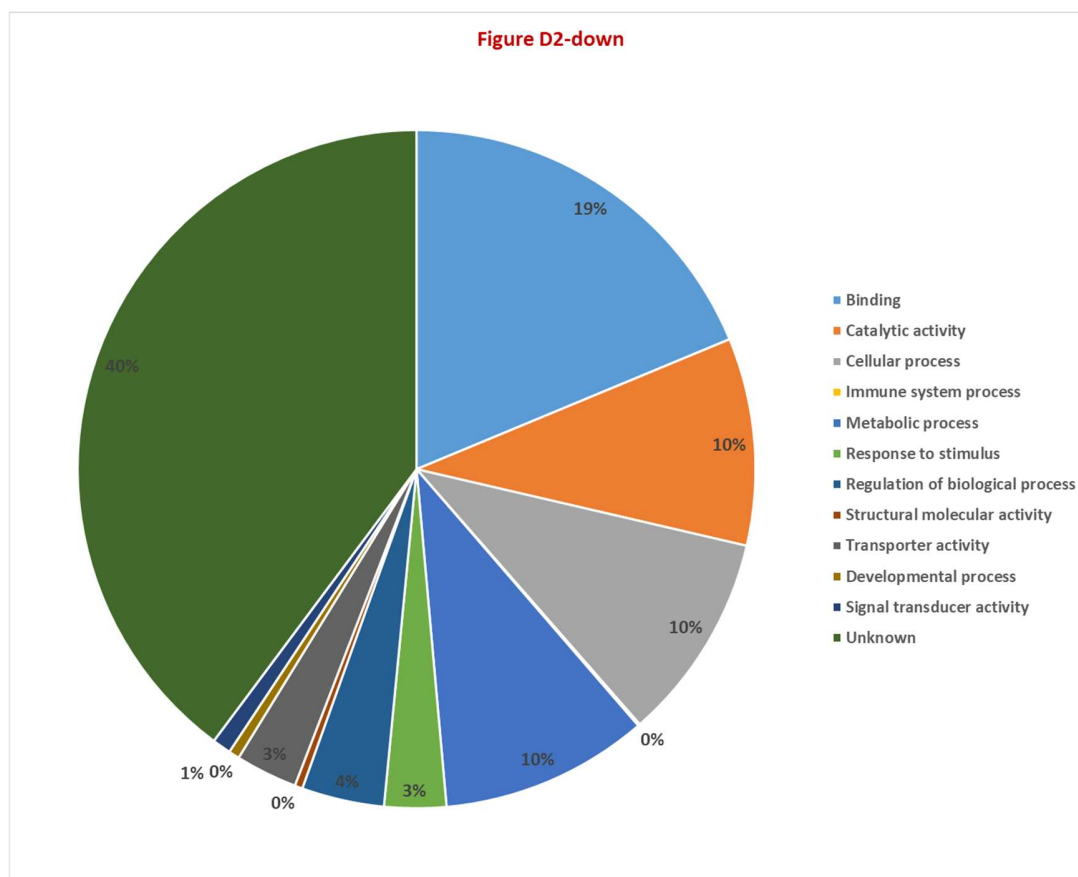

| Functional categories |                                  | Gene No. | Percentage |
|-----------------------|----------------------------------|----------|------------|
| GO:0005488            | Binding                          | 183      | 18.74%     |
| GO:0003824            | Catalytic activity               | 96       | 9.88%      |
| GO:0009987            | Cellular process                 | 97       | 9.93%      |
| GO:0002376            | Immune system process            | 1        | 0.09%      |
| GO:0008152            | Metabolic process                | 97       | 9.93%      |
| GO:0050896            | Response to stimulus             | 29       | 2.95%      |
| GO:0050789            | Regulation of biological process | 38       | 3.94%      |
| GO:0005198            | Structural molecular activity    | 4        | 0.37%      |
| GO:0005215            | Transporter activity             | 29       | 2.95%      |
| GO:0032502            | Developmental process            | 5        | 0.52%      |
| GO:0004871            | Signal transducer activity       | 9        | 0.89%      |
|                       |                                  | 587      |            |
|                       | Unknown                          | 388      | 39.79%     |
| <b>Figure S1D2</b>    | Total                            | 975      |            |

Figure E1-up

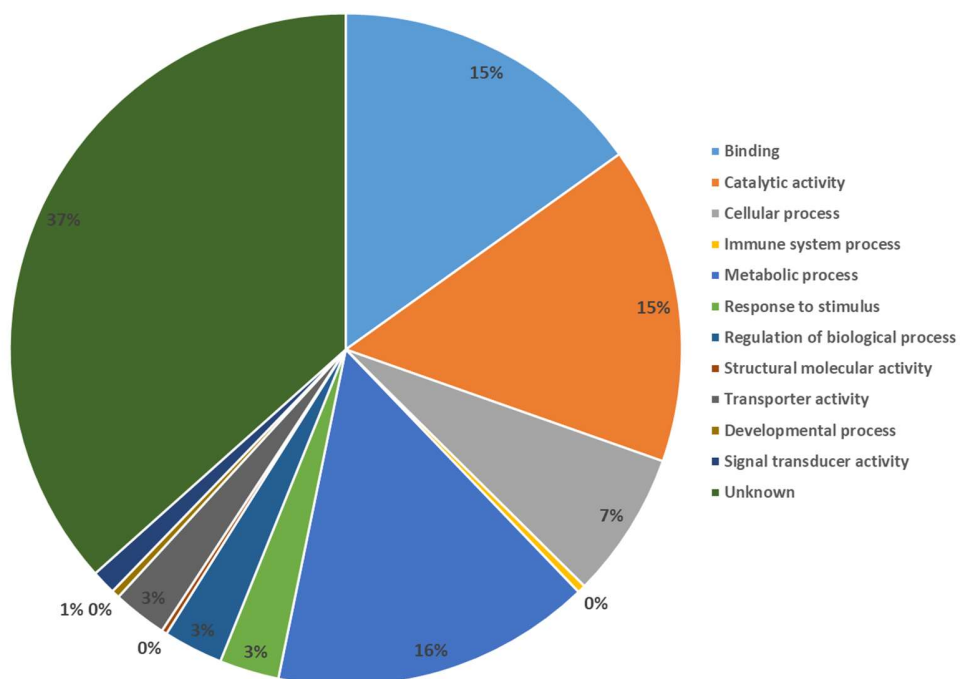

| Functional categories |                                  | Gene No.   | Percentage |
|-----------------------|----------------------------------|------------|------------|
| GO:0005488            | Binding                          | 51         | 15.13%     |
| GO:0003824            | Catalytic activity               | 51         | 15.26%     |
| GO:0009987            | Cellular process                 | 24         | 7.04%      |
| GO:0002376            | Immune system process            | 1          | 0.39%      |
| GO:0008152            | Metabolic process                | 52         | 15.39%     |
| GO:0050896            | Response to stimulus             | 10         | 2.87%      |
| GO:0050789            | Regulation of biological process | 10         | 2.87%      |
| GO:0005198            | Structural molecular activity    | 1          | 0.26%      |
| GO:0005215            | Transporter activity             | 9          | 2.61%      |
| GO:0032502            | Developmental process            | 1          | 0.39%      |
| GO:0004871            | Signal transducer activity       | 4          | 1.17%      |
|                       |                                  | 213        |            |
|                       | Unknown                          | 123        | 36.61%     |
| <b>Figure S1E1</b>    | <b>Total</b>                     | <b>336</b> |            |

**Table S1.** Summary of RNA-seq analysis based on the *Aedes aegypti* transcriptomes.

| Sample ID       | Raw reads R1 | Raw reads R2 | Cleaned reads R1 | Cleaned reads R1 | Mapped reads (R1+R2) | % of mapped reads | Mapped transcripts |
|-----------------|--------------|--------------|------------------|------------------|----------------------|-------------------|--------------------|
| A3 <sup>1</sup> | 15,249,374   | 15,249,374   | 15,246,445       | 15,197,063       | 16,456,732           | 54.06             | 13,340             |
| B3 <sup>1</sup> | 14,551,995   | 14,551,995   | 14,547,933       | 14,507,126       | 17,859,022           | 61.47             | 13,471             |
| C3 <sup>1</sup> | 15,681,057   | 15,681,057   | 15,679,156       | 15,660,510       | 19,742,347           | 62.99             | 13,985             |
| E3 <sup>2</sup> | 18,294,687   | 18,294,687   | 18,292,355       | 18,208,093       | 22,039,021           | 60.38             | 14,386             |
| F3 <sup>2</sup> | 12,497,295   | 12,497,295   | 12,495,450       | 12,455,741       | 15,396,499           | 61.71             | 13,952             |
| G3 <sup>2</sup> | 17,566,008   | 17,566,008   | 17,564,008       | 17,531,085       | 21,793,543           | 62.10             | 14,379             |
| H3 <sup>3</sup> | 36,035,055   | 36,035,055   | 36,024,025       | 36,011,050       | 25,633,634           | 35.58             | 14,287             |
| I3 <sup>3</sup> | 36,757,692   | 36,757,692   | 36,739,213       | 36,724,336       | 35,906,241           | 48.88             | 14,552             |
| J3 <sup>3</sup> | 32,925,593   | 32,925,593   | 32,914,213       | 32,901,086       | 36,273,185           | 55.11             | 14,065             |
| K3 <sup>4</sup> | 30,895,140   | 30,895,140   | 30,887,834       | 30,883,906       | 15,714,415           | 25.44             | 13,699             |
| L3 <sup>4</sup> | 29,453,796   | 29,453,796   | 29,439,544       | 29,428,165       | 30,662,321           | 52.09             | 13,957             |
| M3 <sup>4</sup> | 32,527,728   | 32,527,728   | 32,520,115       | 32,506,621       | 32,313,251           | 49.69             | 14,226             |
| H0 <sup>5</sup> | 31,187,794   | 31,187,794   | 31,185,876       | 31,171,790       | 9,822,781            | 15.75             | 13,506             |
| I0 <sup>5</sup> | 30,743,396   | 30,743,396   | 30,738,833       | 30,725,609       | 32,979,060           | 53.66             | 14,376             |
| J0 <sup>5</sup> | 33,318,113   | 33,318,113   | 33,310,791       | 33,296,664       | 37,160,333           | 55.79             | 14,026             |
| K0 <sup>6</sup> | 37,018,624   | 37,018,624   | 37,009,861       | 36,994,319       | 43,186,699           | 58.36             | 14,879             |
| L0 <sup>6</sup> | 33,265,010   | 33,265,010   | 33,260,119       | 33,247,298       | 34,456,987           | 51.81             | 14,755             |
| M0 <sup>6</sup> | 34,732,453   | 34,732,453   | 34,727,178       | 34,712,231       | 22,215,700           | 31.99             | 14,423             |

<sup>1</sup>A3, B3, and C3 are *Aedes aegypti* Orlando strain control three-days post ingestion blood;

<sup>2</sup>E3, F3, and G3 are *Ae. aegypti* Orlando strain chikungunya virus three-days post ingestion;

<sup>3</sup>H3, I3, and J3 are *Ae. aegypti* Key West strain control three-days post ingestion blood;

<sup>4</sup>K3, L3, and M3 are *Ae. aegypti* Key West strain chikungunya virus three-days post ingestion;

<sup>5</sup>H0, I0 and J0 are *Ae. aegypti* Key West strain control three-hours post ingestion blood;

<sup>6</sup>K0, L0 and M0 are *Ae. aegypti* Key West strain chikungunya virus three-hours post ingestion.
